# Supplementary material
Source: publisher figshare collection journal article supplement (https://tandf.figshare.com/articles/dataset/_/8046086)
Supplement: Supplementary file 1 [file 2]

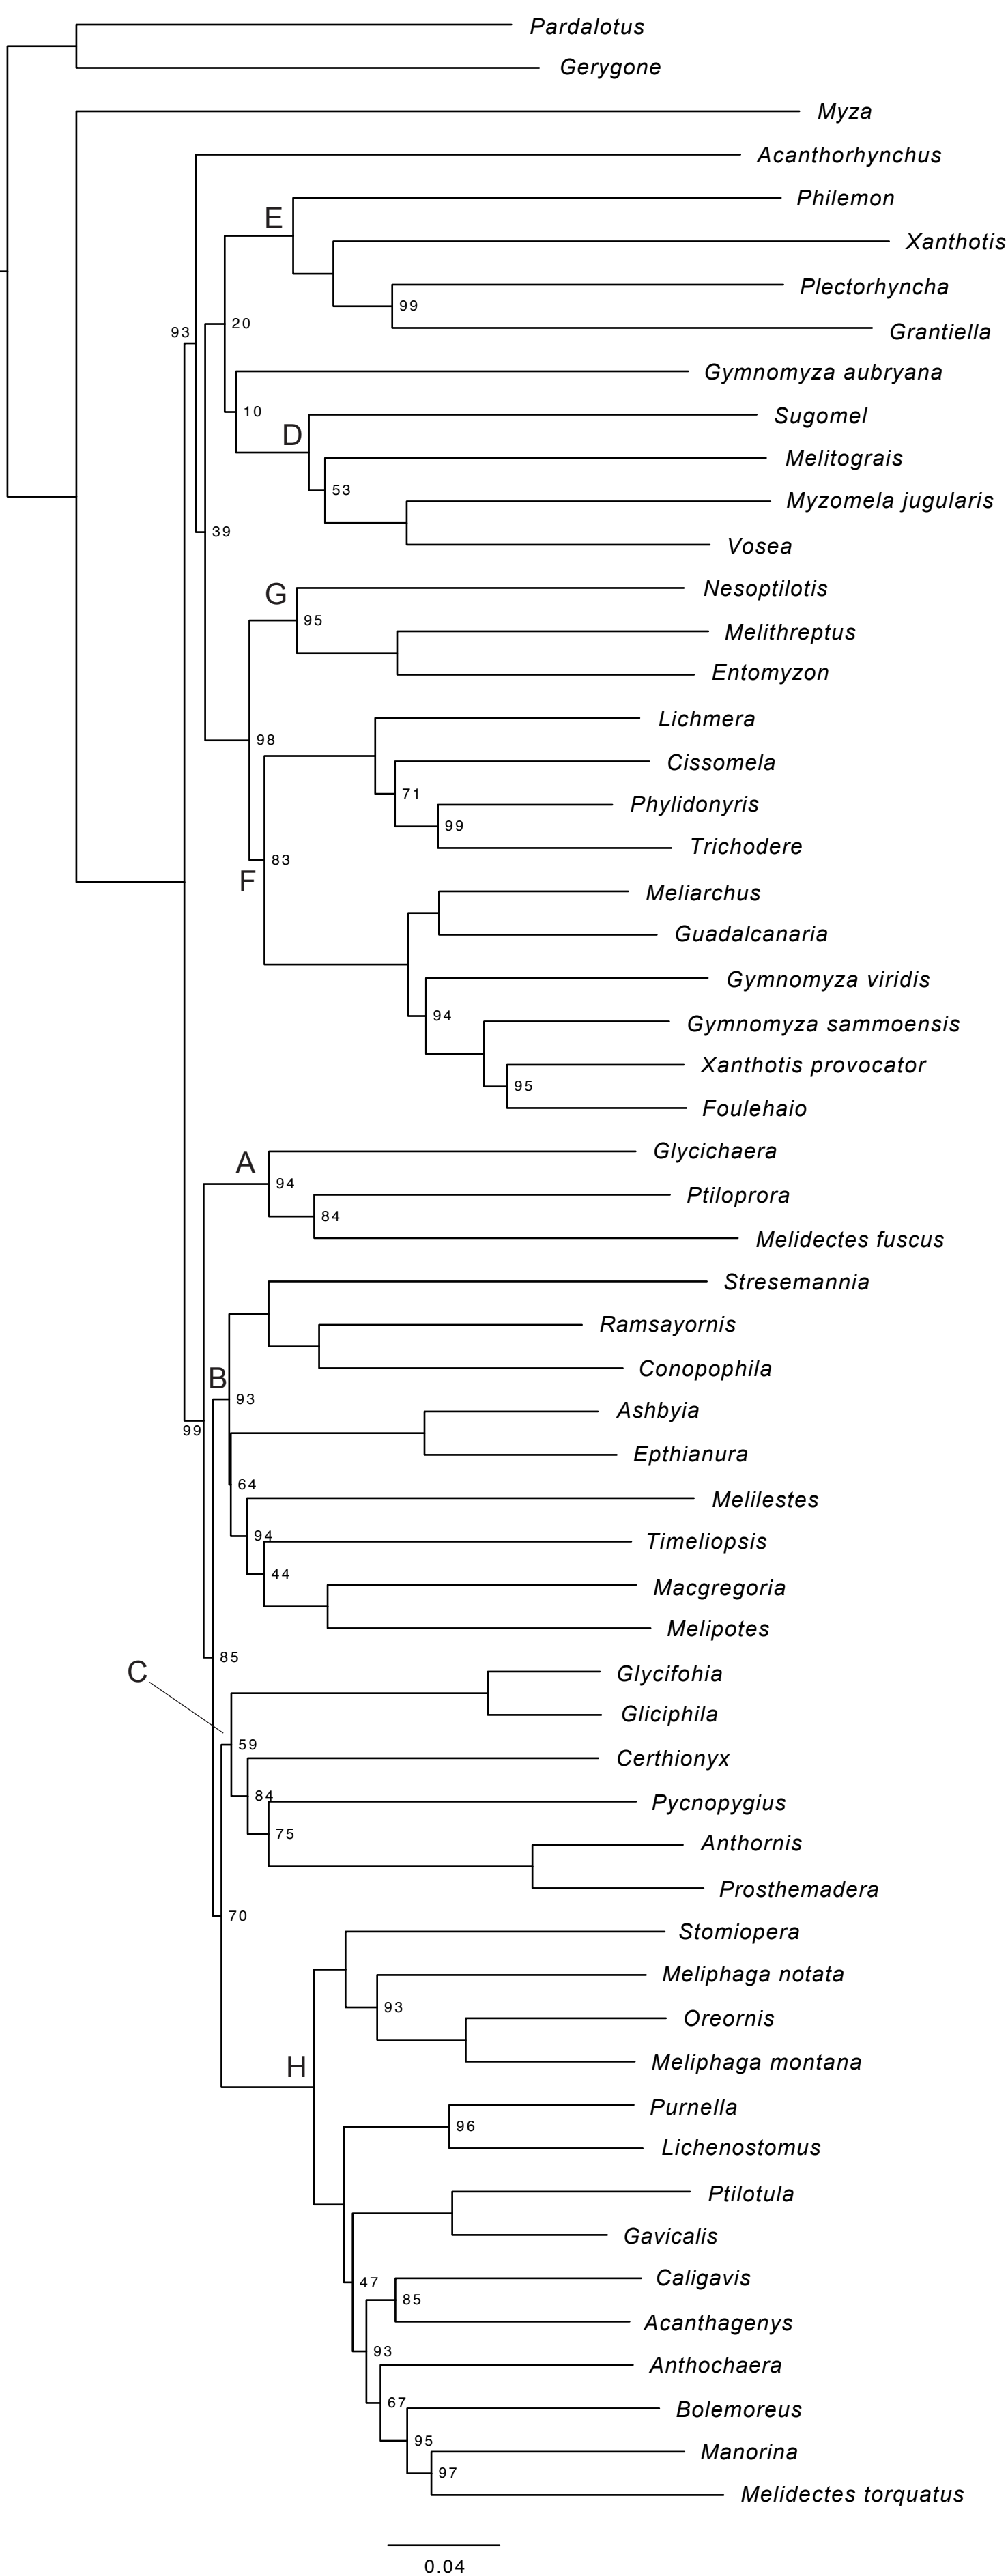

Figure S3. Maximum likelihood topology from all mitochondrial coding regions, partitioned by codon position, of the 60-tip dataset (i.e., inclusive of *Gymnomyza aubryana*). Bootstrap support is listed for nodes that received <100. Clades A–H are referenced in the text. Only genus names are given, except for instances of where we sampled multiple, paraphyletic genera.
