# Supplementary material
Source: publisher figshare collection journal article supplement (https://tandf.figshare.com/articles/dataset/_/8046086)
Supplement: Supplementary file 2 [file 2]

Archive with 8 entries (8 files):
- temu_a_1595662_sm5331.docx
- temu_a_1595662_sm5327.pdf
- temu_a_1595662_sm5286.pdf
- temu_a_1595662_sm5277.pdf
- temu_a_1595662_sm5275.pdf
- temu_a_1595662_sm5265.pdf
- temu_a_1595662_sm5263.pdf
- temu_a_1595662_sm5256.pdf
