# Supplementary material
Source: publisher figshare collection journal article supplement (https://tandf.figshare.com/articles/dataset/_/8046086)
Supplement: Supplementary file 2 [file 2 › temu_a_1595662_sm5256.pdf]

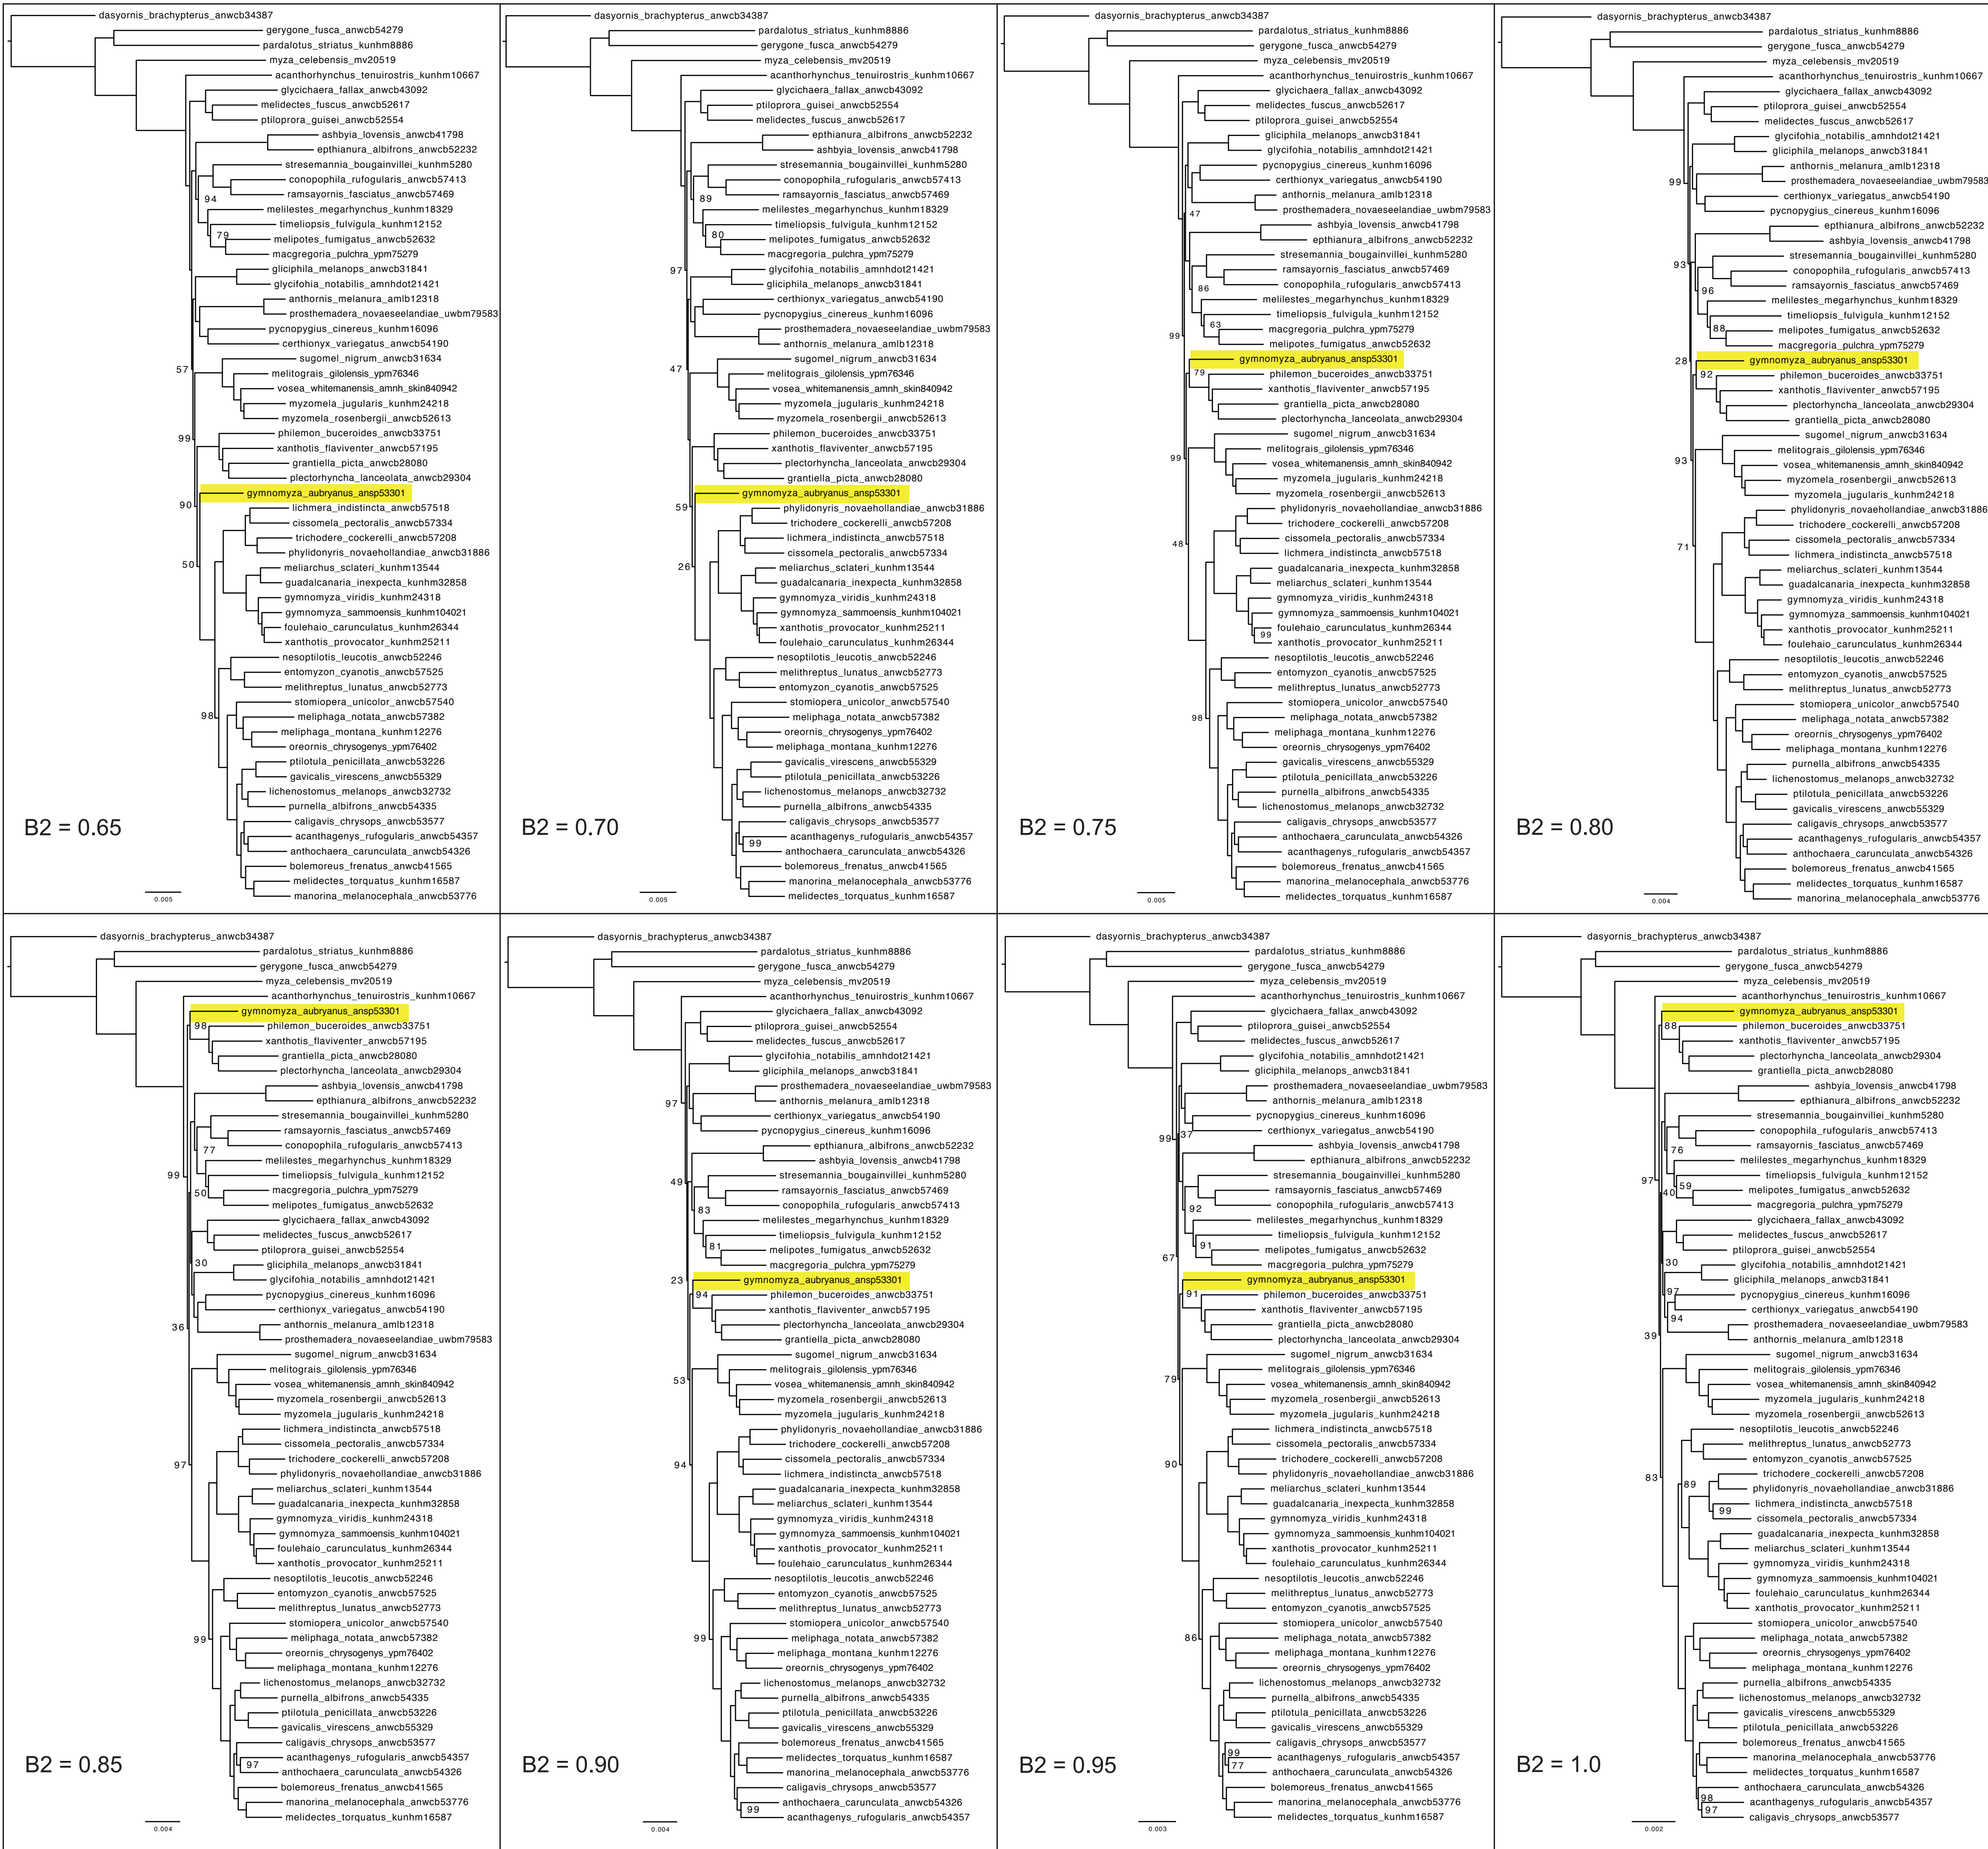

Figure S7. Uncertainty of *Gymnomyza aubryana*. Eight maximum likelihood trees based on the 75% complete, 60-tip dataset with varying degrees of the trimming parameter, B2, of Gblocks. B2 is the proportion of sequences at a flank position. Note that B2 ranges from 0.65 to 1.0. The amount of data increases as B2 decreases, due to the decrease of trimming stringency.
