# Supplementary material
Source: publisher figshare collection journal article supplement (https://tandf.figshare.com/articles/dataset/_/8046086)
Supplement: Supplementary file 2 [file 2 › temu_a_1595662_sm5265.pdf]

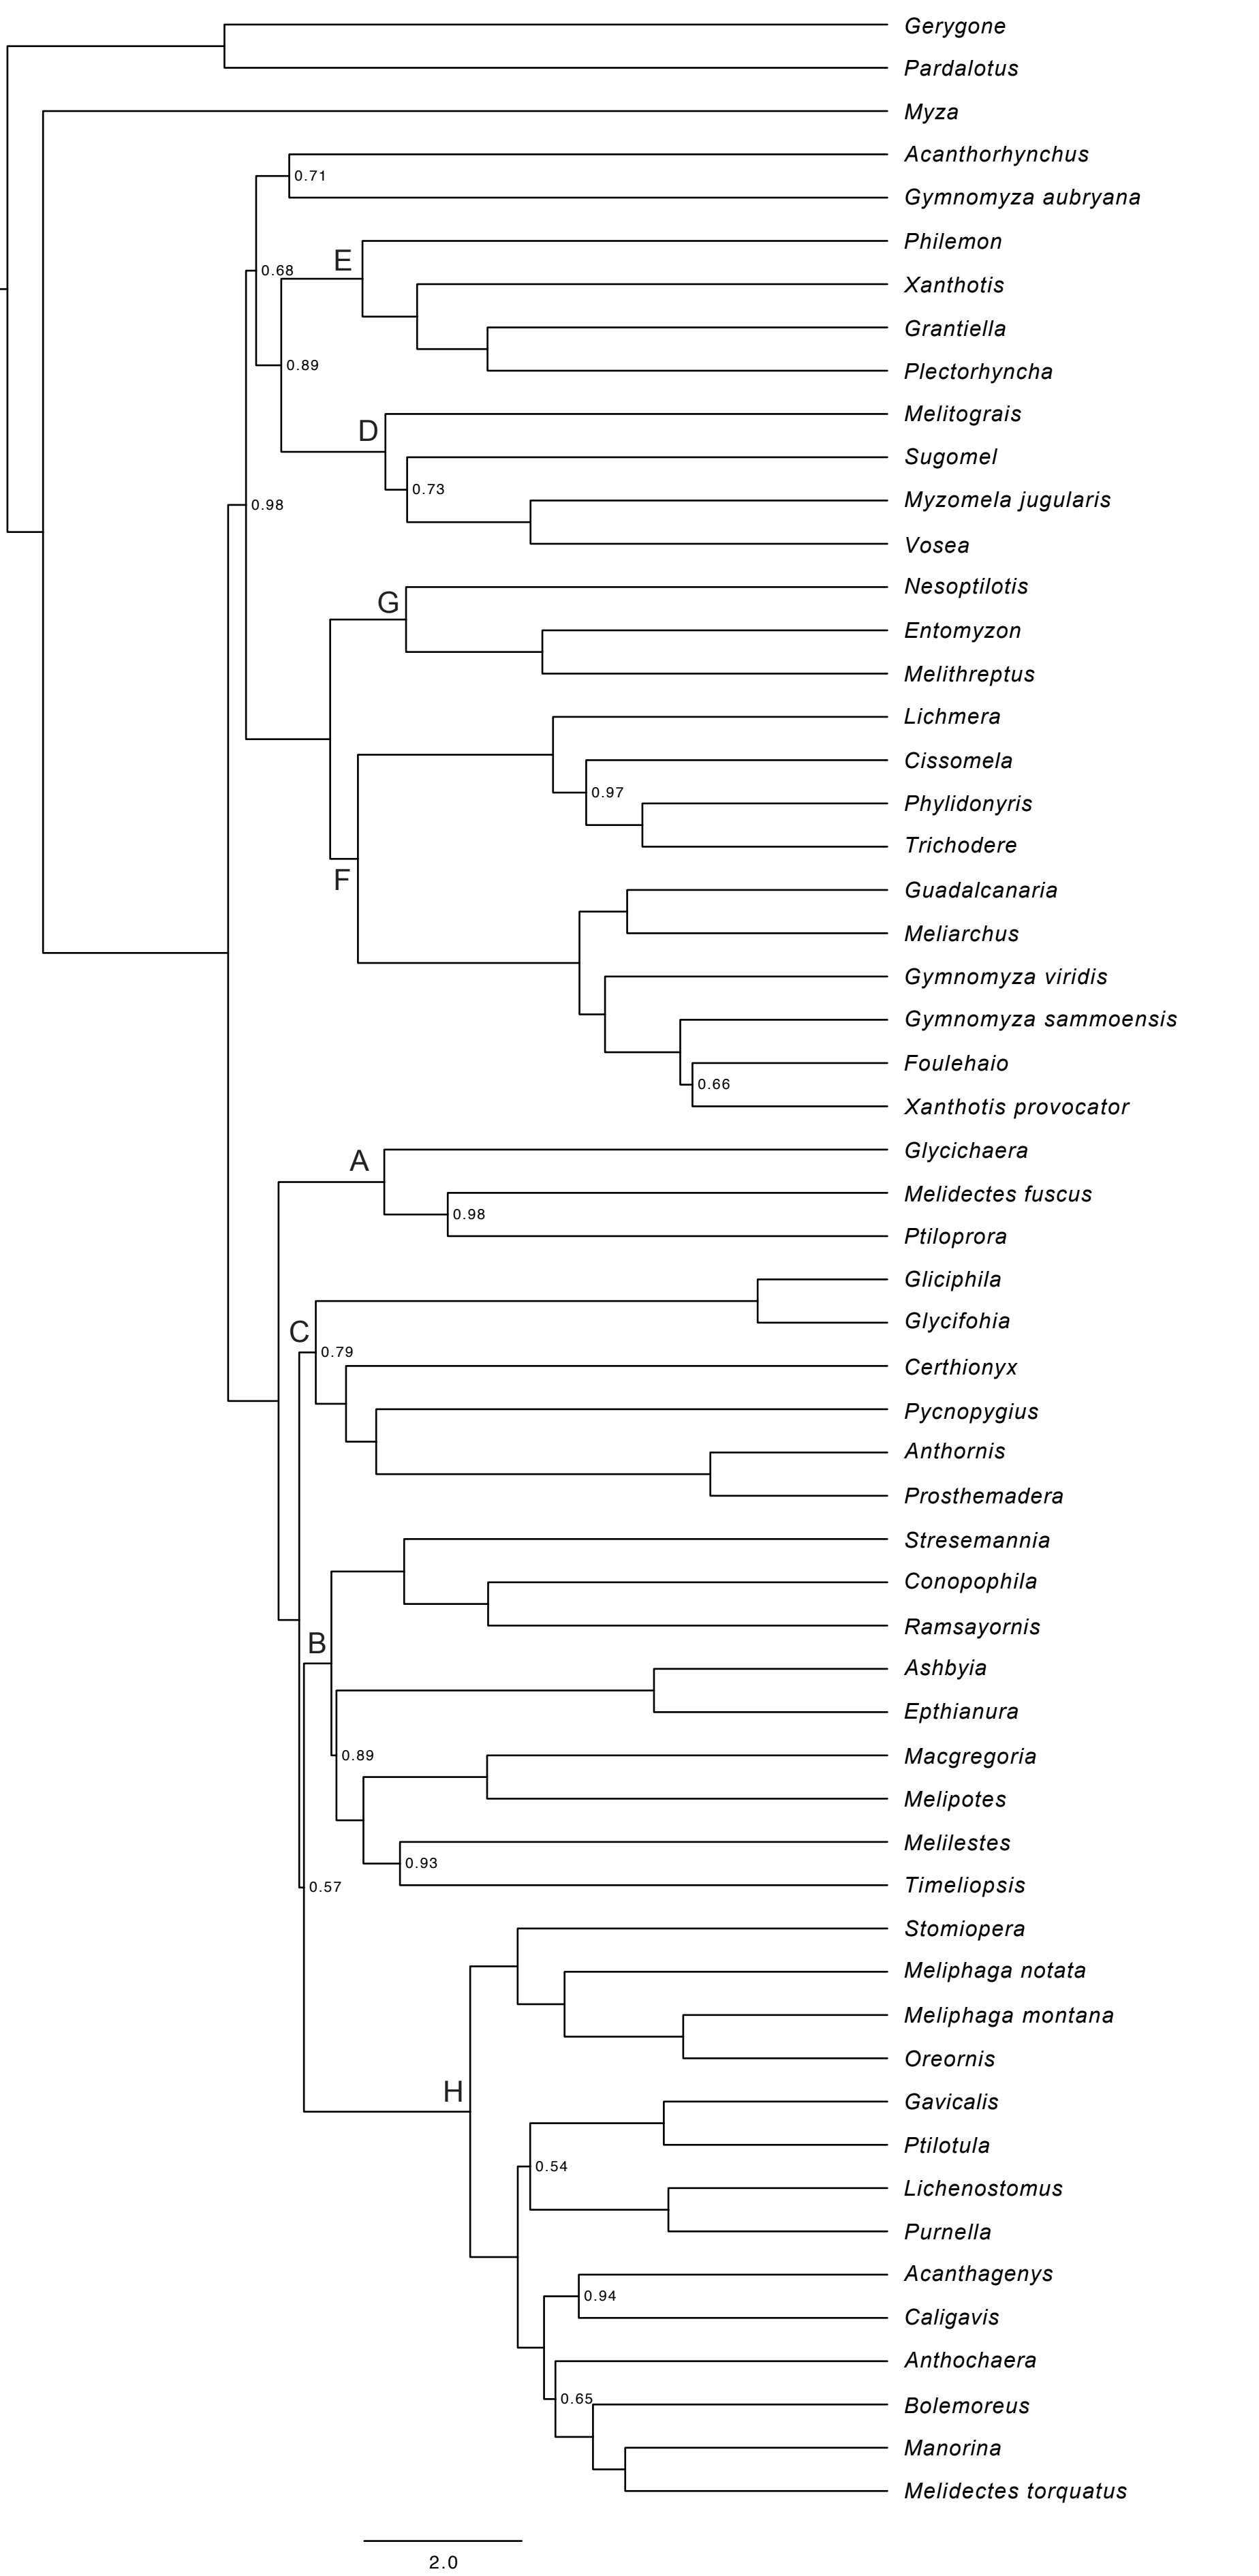

Figure S5. Bayesian maximum clade credibility tree from all mitochondrial coding regions, partitioned by codon position, of the 60-tip dataset (i.e., inclusive of *Gymnomyza aubryana*). Node support is given as posterior probabilities if less than 1. Clades A–H are referenced in the text. Only genus names are given, except for instances of where we sampled multiple, paraphyletic genera.
