# Supplementary material
Source: publisher figshare collection journal article supplement (https://tandf.figshare.com/articles/dataset/_/8046086)
Supplement: Supplementary file 2 [file 2 › temu_a_1595662_sm5286.pdf]

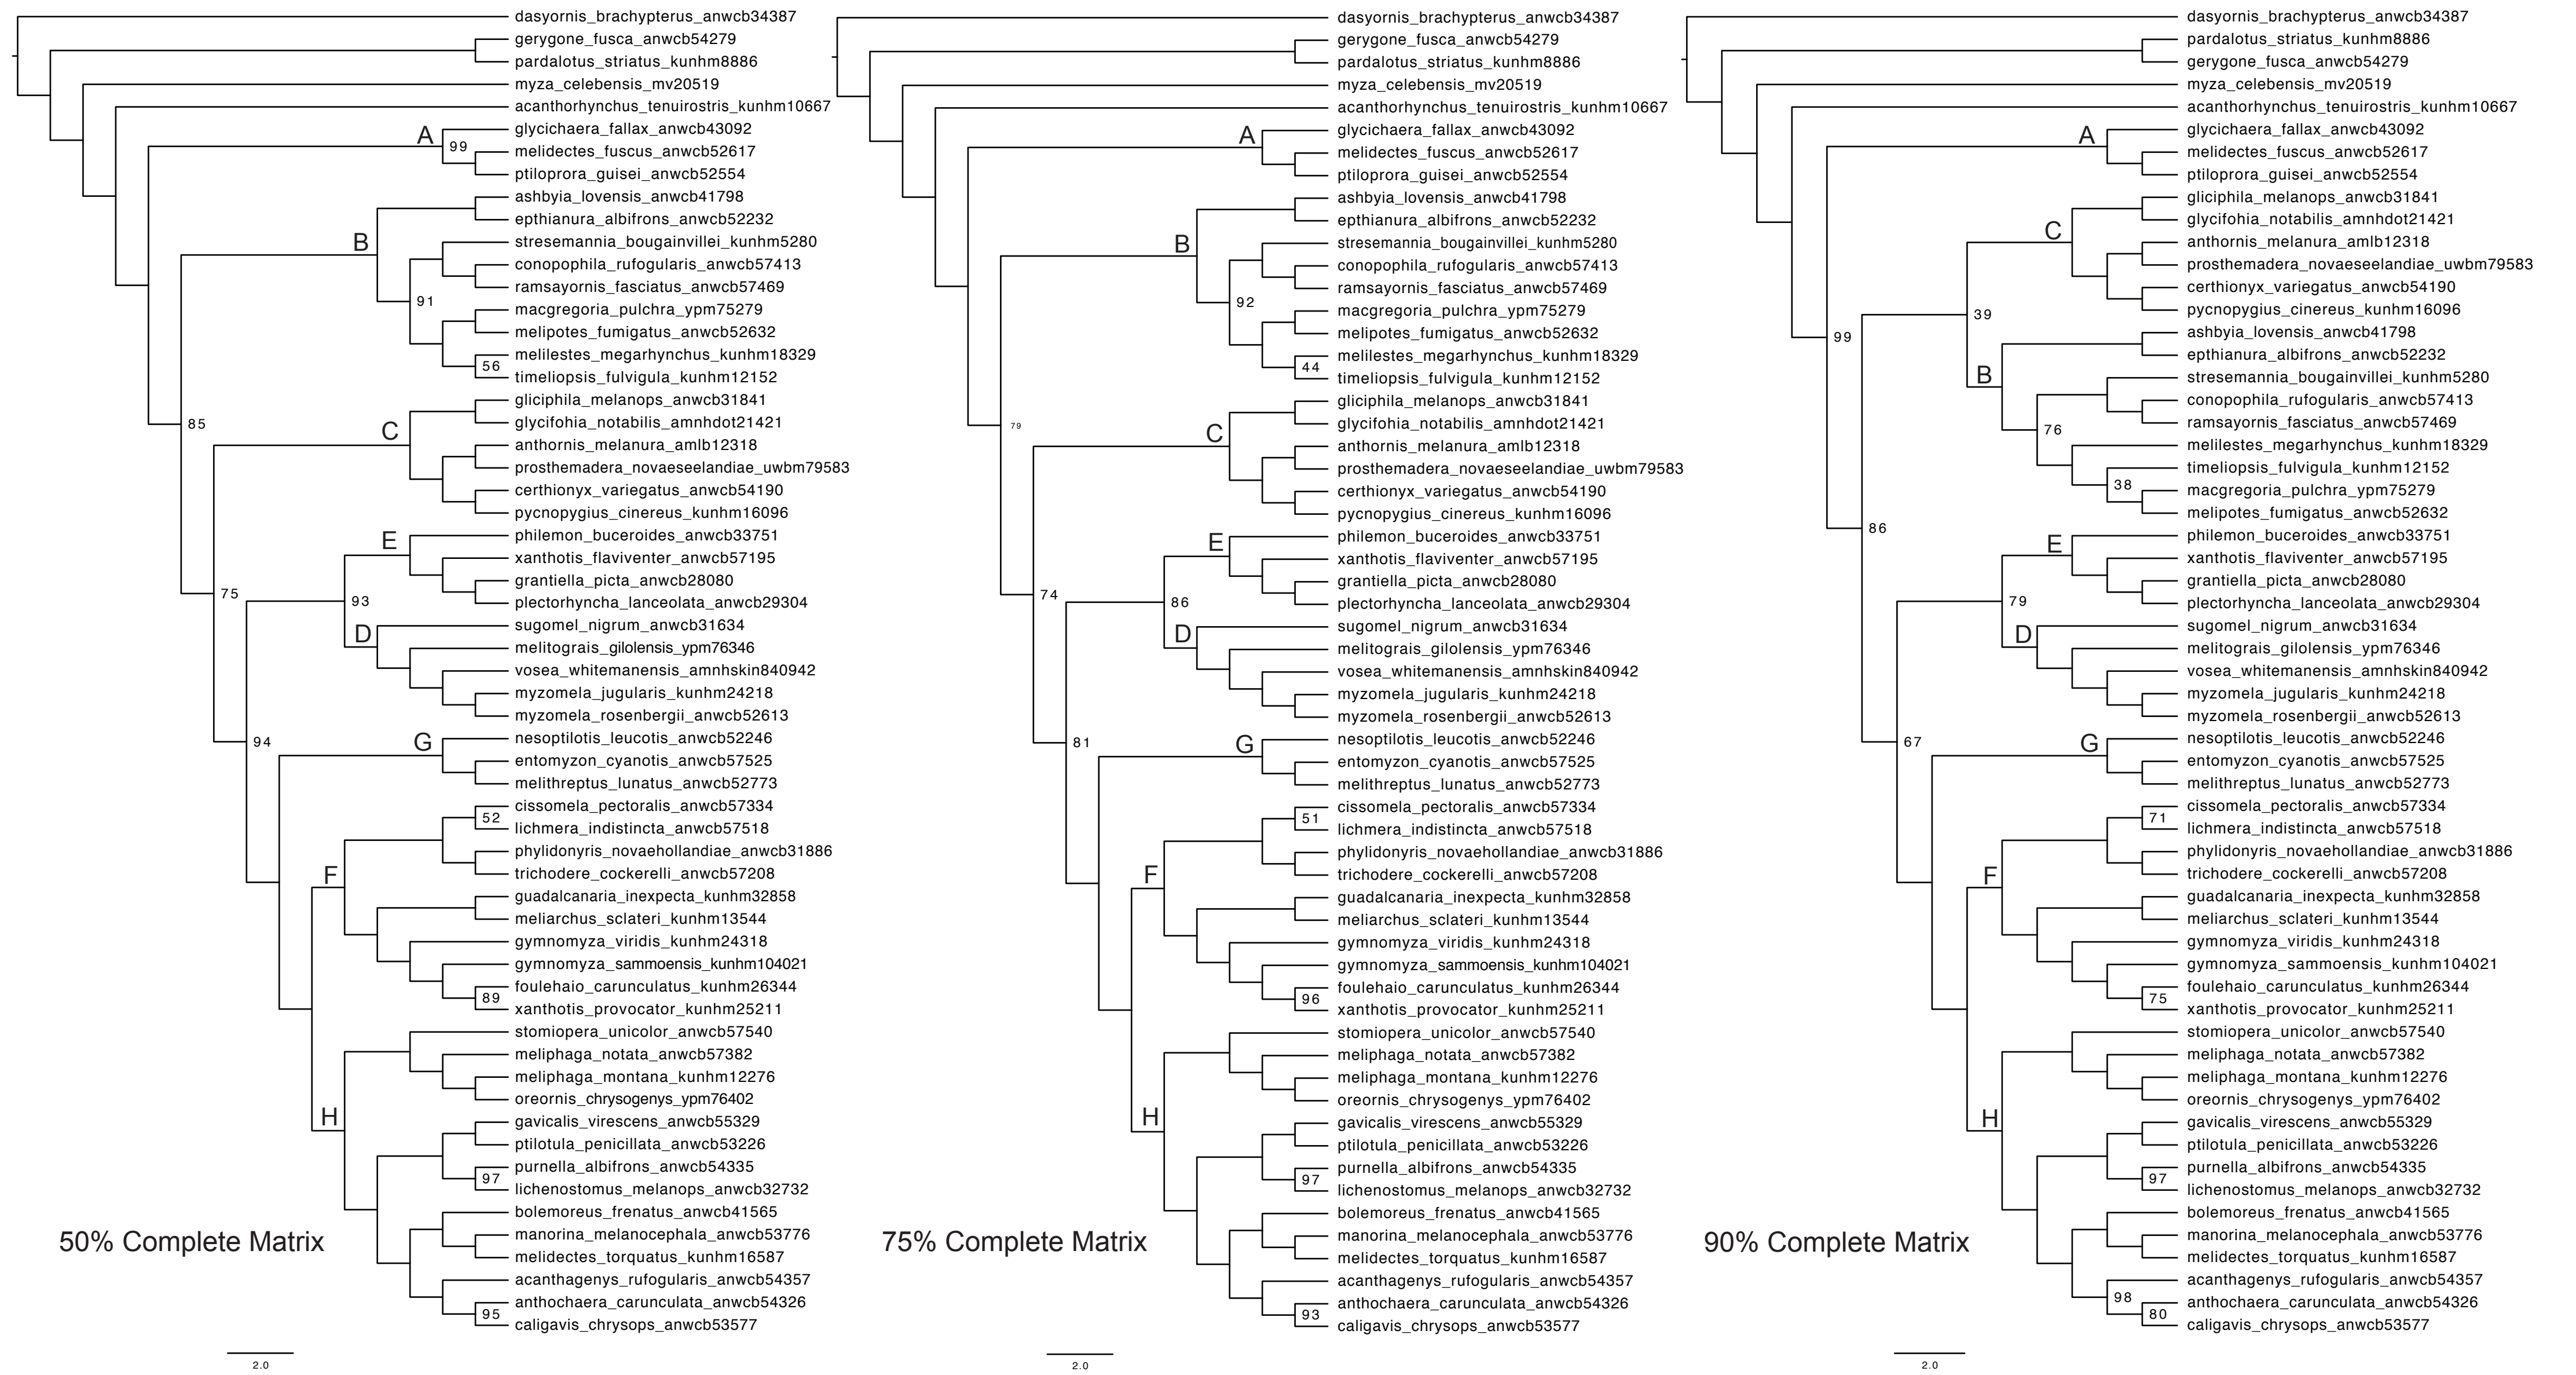

Figure S2. SVDQuartets phylogenies of honeyeater genera. The trees are based on the 50%, 75%, and 90% complete, 59-tip datasets (i.e., lacking *Gymnomyza aubryana*). Bootstrap support is listed for nodes that received <100. Clades A–H are referenced in the text. Only genus names are given, except for instances of where we sampled multiple, paraphyletic genera.
