# Supplementary material
Source: publisher figshare collection journal article supplement (https://tandf.figshare.com/articles/dataset/_/8046086)
Supplement: Supplementary file 2 [file 2 › temu_a_1595662_sm5327.pdf]

## GC content versus pairwise nucleotide identity

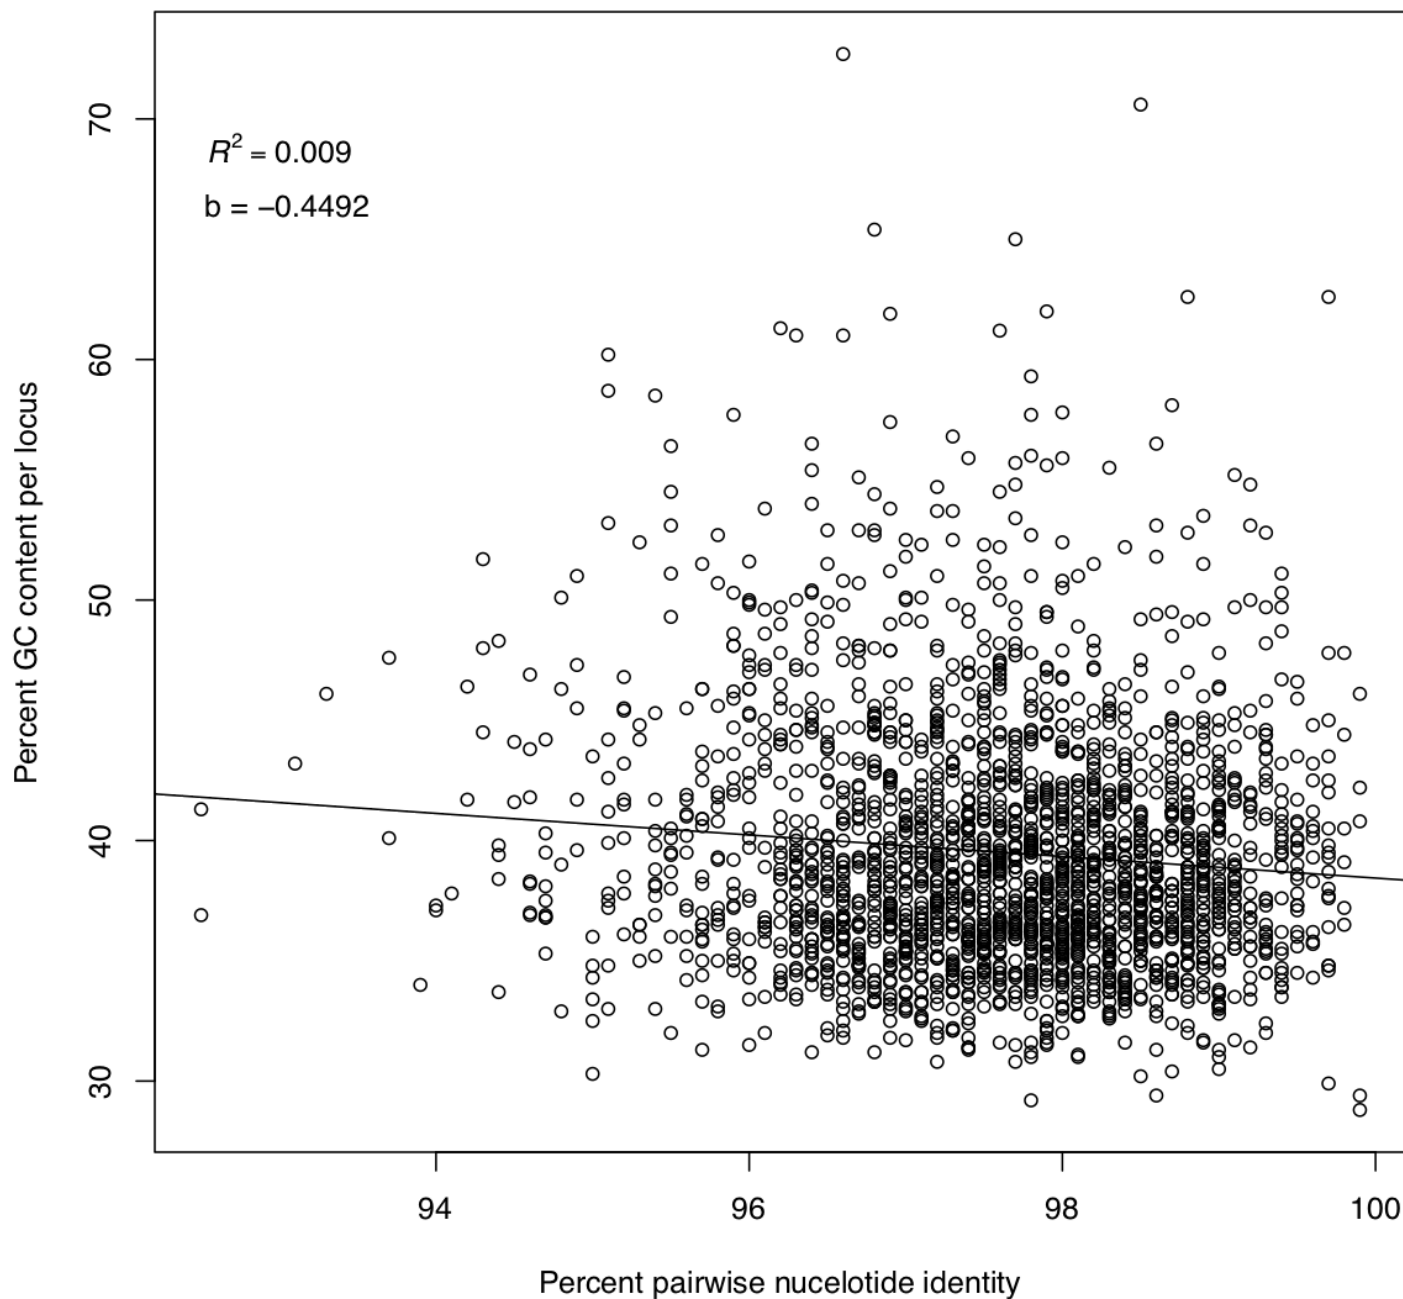

Figure S1. Plot of GC content versus percent pairwise nucleotide identity for each UCE for the 90%, 59-tip dataset
