# Supplementary material
Source: publisher figshare collection journal article supplement (https://tandf.figshare.com/articles/dataset/_/8046086)
Supplement: Supplementary file 2 [file 2 › temu_a_1595662_sm5331.docx]

**Online Supplemental Material**

**Ultraconserved elements resolve genus-level relationships in a major Australasian bird radiation (Aves: Meliphagidae)**

Michael J. Andersena*, Jenna M. McCullougha, Nicholas R. Friedmanb, A. Townsend Petersonc, Robert G. Moylec, Leo Josephd, Árpád S. Nyárie

*aDepartment of Biology and Museum of Southwestern Biology, University of New Mexico, Albuquerque, NM, USA; bBiodiversity and Biocomplexity Unit, Okinawa Institute of Science and Technology Graduate University, 1919-1 Tancha, Onna-son, Okinawa, Japan; cBiodiversity Institute and Department of Ecology and Evolutionary Biology, University of Kansas, Lawrence, KS, USA; dAustralian National Wildlife Collection, CSIRO National Research Collections Australia, Canberra, ACT, Australia; eDepartment of Ecology and Evolutionary Biology, University of Tennessee-Knoxville, Knoxville, TN, USA*

*Corresponding author email: mjandersen@unm.edu Orcid ID: https://orcid.org/0000-0002-7220-5588

**Table S1.** List of samples used in this study. DNA samples derived from museum specimens (i.e., toepads) are noted with 1; all other samples were from tissues. Taxonomy follows Gill and Donsker (2018). Institutional abbreviations are as follows: CM, Canterbury Museum; AMNH, American Museum of Natural History; ANSP, Academy of Natural Sciences of Drexel University; ANWC, Australian National Wildlife Collection, CSIRO Canberra; KU, University of Kansas Biodiversity Institute; MV, Museums Victoria; USNM, National Museum of Natural History, Smithsonian Institution; UWBM, University of Washington Burke Museum of Natural History and Culture; YPM, Yale Peabody Museum.

| Taxon | Institution Voucher | Country | State/Prov/Island | UCE accession number | Total number of clean reads | Mean trimmed read length (bp) | No. of UCEs | Total UCE bp | Ave. UCE contig length | contigs >1kb |
| --- | --- | --- | --- | --- | --- | --- | --- | --- | --- | --- |
| *Acanthagenys rufogularis* | ANWC B54357 | Australia | Western Australia | SAMN10580892 | 1,440,777 | 137.6 | 4110 | 5,197,791 | 1264.7 | 3245 |
| *Acanthorhynchus tenuirostris* | KU 10667 | Australia | New South Wales | SAMN04301697 | 4,781,235 | 99.4 | 4240 | 4,228,612 | 997.3 | 2414 |
| *Anthochaera carunculata* | ANWC B54326 | Australia | Western Australia | SAMN10580893 | 3,742,573 | 135.7 | 4198 | 4,999,318 | 1190.9 | 3236 |
| *Anthornis melanura* | CM AML B12318 | New Zealand | Tiritiri Matangi Island | SAMN10580894 | 2,035,978 | 139.8 | 4210 | 5,037,770 | 1196.6 | 3265 |
| *Ashbyia lovensis* | ANWC B41798 | Australia | Queensland | SAMN10580895 | 1,786,125 | 139.3 | 4187 | 5,124,726 | 1224.0 | 3255 |
| *Bolemoreus frenatus* | ANWC B41565 | Australia | Queensland | SAMN10580896 | 2,516,911 | 139.9 | 4281 | 5,533,765 | 1292.6 | 3586 |
| *Caligavis chrysops* | ANWC B53577 | Australia | New South Wales | SAMN10580897 | 2,267,964 | 137.9 | 4187 | 5,376,912 | 1284.2 | 3490 |
| *Certhionyx variegatus* | ANWC B54190 | Australia | Western Australia | SAMN10580898 | 1,179,905 | 138.4 | 4089 | 4,940,624 | 1208.3 | 3106 |
| *Cissomela pectoralis* | ANWC B57334 | Australia | Queensland | SAMN10580899 | 1,097,101 | 137.9 | 4133 | 4,769,186 | 1153.9 | 2982 |
| *Conopophila rufogularis* | ANWC B57413 | Australia | Queensland | SAMN10580900 | 3,254,351 | 137.6 | 4211 | 5,218,995 | 1239.4 | 3360 |
| *Dasyornis brachypterus* | ANWC B34387 | Australia | New South Wales | SAMN10580901 | 2,501,759 | 136.5 | 4400 | 4,041,758 | 918.6 | 1746 |
| *Entomyzon cyanotis* | ANWC B57525 | Australia | Queensland | SAMN10580902 | 3,048,873 | 134.5 | 4381 | 4,774,638 | 1089.9 | 3059 |
| *Epthianura albifrons* | ANWC B52232 | Australia | South Australia | SAMN10580903 | 2,157,270 | 136.5 | 4149 | 4,215,790 | 1016.1 | 2443 |
| *Foulehaio carunculatus* | KU 26344 | Fiji | Ogea Levu Island | SAMN04301727 | 6,480,608 | 99.0 | 4549 | 3,209,815 | 705.6 | 191 |
| *Gavicalis virescens* | ANWC B55329 | Australia | Western Australia | SAMN10580904 | 2,135,954 | 138.9 | 4179 | 5,279,672 | 1263.4 | 3405 |
| *Gerygone fusca* | ANWC B54279 | Australia | Western Australia | SAMN10580905 | 2,177,446 | 139.2 | 4224 | 5,634,048 | 1333.8 | 3635 |
| *Gliciphila melanops* | ANWC B31841 | Australia | Western Australia | SAMN10580906 | 3,448,329 | 139.1 | 4163 | 5,411,642 | 1299.9 | 3524 |
| *Glycichaera fallax* | ANWC B43092 | Australia | Queensland | SAMN10580907 | 1,774,847 | 136.8 | 4306 | 4,524,999 | 1050.9 | 2780 |
| *Glycifohia notabilis* | AMNH DOT21421 | Vanuatu | Vanua Lava Island | SAMN10580908 | 1,924,968 | 140.9 | 4293 | 5,087,380 | 1185.0 | 3361 |
| *Grantiella picta* | ANWC B28080 | Australia | Queensland | SAMN10580909 | 4,409,516 | 135.8 | 4231 | 5,088,113 | 1202.6 | 3255 |
| *Guadalcanaria inexpecta* | KU 32858 | Solomon Islands | Guadalcanal Island | SAMN10580910 | 2,248,530 | 138.2 | 4282 | 5,351,228 | 1249.7 | 3403 |
| *Gymnomyza aubryanus* | ANSP 533011 | New Caledonia |  | SAMN10580911 | 1,714,190 | 109.1 | 3992 | 1,360,453 | 340.8 | 0 |
| *Gymnomyza sammoensis* | KU 1040211 | Samoa | Upolu Island | SAMN10580912 | 4,068,262 | 131.7 | 4129 | 2,179,800 | 527.9 | 4 |
| *Gymnomyza viridis* | KU 24318 | Fiji | Taveuni Island | SAMN10580913 | 3,075,745 | 141.2 | 4346 | 5,647,357 | 1299.4 | 3740 |
| *Lichenostomus melanops* | ANWC B32732 | Australia | New South Wales | SAMN10580914 | 275,159 | 129.7 | 1210 | 373,224 | 308.4 | 0 |
| *Lichmera indistincta* | ANWC B57518 | Australia | Queensland | SAMN10580915 | 3,279,617 | 140.3 | 4249 | 5,758,405 | 1355.2 | 3682 |
| *Macgregoria pulchra* | YPM 752791 | Indonesia | Papua | SAMN10580916 | 6,009,611 | 144.4 | 4468 | 4,410,575 | 987.1 | 2288 |
| *Manorina melanocephala* | ANWC B53776 | Australia | New South Wales | SAMN10580917 | 1,815,023 | 139.7 | 4294 | 5,286,857 | 1231.2 | 3432 |
| *Meliarchus sclateri* | KU 13544 | Solomon Islands | Makira Island | SAMN10580918 | 2,605,810 | 138.6 | 4332 | 5,382,240 | 1242.4 | 3529 |
| *Melidectes fuscus* | ANWC B52617 | Papua New Guinea | Southern Highlands | SAMN10580919 | 3,753,743 | 124.9 | 3963 | 3,797,118 | 958.1 | 1944 |
| *Melidectes torquatus* | KU 16587 | Papua New Guinea | East Highlands | SAMN10580920 | 7,184,029 | 139.2 | 3902 | 5,205,990 | 1334.2 | 3062 |
| *Melilestes megarhynchus* | KU 18329 | Papua New Guinea | West Sepik | SAMN10580921 | 4,674,703 | 138.0 | 4222 | 6,107,283 | 1446.5 | 3717 |
| *Meliphaga montana* | KU 12276 | Papua New Guinea | Madang | SAMN04301744 | 2,621,474 | 99.3 | 4218 | 2,090,200 | 495.5 | 4 |
| *Meliphaga notata* | ANWC B57382 | Australia | Queensland | SAMN10580922 | 3,400,382 | 140.0 | 4349 | 5,894,305 | 1355.3 | 3813 |
| *Melipotes fumigatus* | ANWC B52632 | Papua New Guinea | Southern Highlands | SAMN10580923 | 4,565,054 | 140.4 | 4252 | 5,867,020 | 1379.8 | 3727 |
| *Melithreptus lunatus* | ANWC B52773 | Australia | New South Wales | SAMN10580924 | 2,238,081 | 137.2 | 4128 | 3,801,748 | 921.0 | 1799 |
| *Melitograis gilolensis* | YPM 763461 | Indonesia | Bacan Island | SAMN10580925 | 1,604,755 | 143.6 | 4379 | 2,681,951 | 612.5 | 12 |
| *Myza celebensis* | MV 20519 | Indonesia | Sulawesi Island | SAMN10580926 | 1,741,397 | 138.4 | 4205 | 5,287,594 | 1257.5 | 3413 |
| *Myzomela jugularis* | KU 24218 | Fiji | Vanua Levu Island | SAMN10580927 | 2,774,058 | 138.1 | 4329 | 5,441,935 | 1257.1 | 3500 |
| *Myzomela rosenbergii* | ANWC B52613 | Papua New Guinea | Southern Highlands | SAMN10580928 | 3,293,756 | 136.3 | 4128 | 4,353,069 | 1054.5 | 2575 |
| *Nesoptilotis leucotis* | ANWC B52246 | Australia | South Australia | SAMN10580929 | 3,471,833 | 136.8 | 4224 | 5,555,327 | 1315.2 | 3589 |
| *Oreornis chrysogenys* | YPM 764021 | Indonesia | Papua | SAMN10580930 | 2,263,062 | 143.7 | 4475 | 2,836,422 | 633.8 | 18 |
| *Pardalotus striatus* | KU 8886 | Australia | Western Australia | SAMN04301761 | 6,621,344 | 98.9 | 4376 | 4,428,246 | 1011.9 | 2615 |
| *Philemon buceroides* | ANWC B33751 | Australia | Northern Territory | SAMN10580931 | 4,324,420 | 137.8 | 4441 | 6,022,173 | 1356.0 | 3826 |
| *Phylidonyris novaehollandiae* | ANWC B31886 | Australia | Western Australia | SAMN10580932 | 2,376,335 | 138.9 | 4314 | 5,227,454 | 1211.7 | 3399 |
| *Plectorhyncha lanceolata* | ANWC B29304 | Australia | New South Wales | SAMN10580933 | 2,800,980 | 139.6 | 4327 | 5,752,864 | 1329.5 | 3725 |
| *Prosthemadera novaeseelandiae* | UWBM 79583 | New Zealand | North Island | SAMN10580934 | 5,913,170 | 137.9 | 4262 | 5,260,158 | 1234.2 | 3434 |
| *Ptiloprora guisei* | ANWC B52554 | Papua New Guinea | Western | SAMN10580935 | 1,826,159 | 139.0 | 3681 | 4,217,468 | 1145.7 | 2656 |
| *Ptilotula penicillata* | ANWC B53226 | Australia | New South Wales | SAMN10580936 | 3,680,040 | 139.6 | 3302 | 3,175,453 | 961.7 | 1573 |
| *Purnella albifrons* | ANWC B54335 | Australia | Western Australia | SAMN10580937 | 2,625,988 | 136.6 | 4115 | 4,431,437 | 1076.9 | 2684 |
| *Pycnopygius cinereus* | KU 16096 | Papua New Guinea | Madang | SAMN10580938 | 3,183,089 | 138.9 | 4256 | 5,829,237 | 1369.7 | 3698 |
| *Ramsayornis fasciatus* | ANWC B57469 | Australia | Queensland | SAMN10580939 | 3,273,063 | 140.6 | 4260 | 5,302,214 | 1244.7 | 3480 |
| *Stomiopera unicolor* | ANWC B57540 | Australia | Queensland | SAMN10580940 | 2,060,681 | 126.6 | 4200 | 3,674,749 | 874.9 | 1471 |
| *Stresemannia bougainvillei* | KU 5280 | Papua New Guinea | Bougainville Island | SAMN10580941 | 3,091,295 | 138.1 | 4320 | 5,978,583 | 1383.9 | 3744 |
| *Sugomel nigrum* | ANWC B31634 | Australia | New South Wales | SAMN10580942 | 3,752,233 | 140.7 | 4277 | 5,871,048 | 1372.7 | 3795 |
| *Timeliopsis fulvigula* | KU 12152 | Papua New Guinea | Madang | SAMN04301796 | 2,861,577 | 98.9 | 4122 | 2,980,491 | 723.1 | 555 |
| *Trichodere cockerelli* | ANWC B57208 | Australia | Queensland | SAMN10580943 | 2,199,254 | 139.2 | 4332 | 4,786,975 | 1105.0 | 3129 |
| *Vosea whitemanensis* | AMNH SKIN840942 | Papua New Guinea | New Britain Island | SAMN10580944 | 6,374,253 | 142.8 | 4574 | 3,595,246 | 786.0 | 237 |
| *Xanthotis flaviventer* | ANWC B57195 | Australia | Queensland | SAMN10580945 | 2,522,719 | 138.1 | 4232 | 5,378,623 | 1270.9 | 3511 |
| *Xanthotis provocator* | KU 25211 | Fiji | Kadavu Island | SAMN10580946 | 3,371,506 | 136.8 | 4359 | 5,163,546 | 1184.6 | 3430 |

**Table S2.** Details of datasets analysed in this study.

| Dataset (# of tips) | Data type | % complete | Loci | Total bp | Variable sites | Parsimony informative | % GC | RAxML | BEAST | SVDQuartets | ASTRAL | Missing taxa |
| --- | --- | --- | --- | --- | --- | --- | --- | --- | --- | --- | --- | --- |
| Genera 60 | UCE | 75 | 4,397 | 4,621,410 | 1,124,504 | 413,054 | 39.2 | x |  |  |  | – |
| Genera 59 | UCE | 90 | 2,228 | 2,585,862 | 665,926 | 247,759 | 39.4 | x |  | x | x | *Gymnomyza aubryana* |
| Genera 59 | UCE | 75 | 4,414 | 4,679,026 | 1,139,510 | 418,865 | 39.2 | x |  | x |  | *Gymnomyza aubryana* |
| Genera 59 | UCE | 50 | 4,767 | 4,929,399 | 1,180,510 | 432,599 | 39.2 | x |  | x |  | *Gymnomyza aubryana* |
| Genera 58 | UCE | 90 | 2,228 | 2,585,862 | 665,125 | 247,449 | 39.4 |  |  |  | x | *Gymnomyza aubryana, Lichenostomus* |
| Genera 58 | UCE | 75 | 4,476 | 4,738,055 | 1,150,983 | 422,764 | 39.2 |  |  |  | x | *Gymnomyza aubryana, Lichenostomus* |
| Genera 58 | mitogenome | 100 | 13 | 11,414 | 5,851 | 5,111 | 47.2 | x | x |  |  | *Dasyornis, Myzomela rosenbergii* |
| Genera 57 | mitogenome | 100 | 13 | 11,414 | 5,841 | 5,107 | 47.2 | x | x |  |  | *Dasyornis, Myzomela rosenbergii, Gymnomyza aubryana* |

**Supplemental figure captions**

Figure S1. Plot of GC content versus percent pairwise nucleotide identity for each UCE for the 90%, 59-tip dataset.

Figure S2. SVDQuartets phylogenies of honeyeater genera. The trees are based on the 50% complete, 75%, and 90%, 59-tip dataset (i.e., lacking *Gymnomyza aubryana*). Bootstrap support is listed for nodes that received <100. Clades A–H are referenced in the text. Only genus names are given, except for instances of where we sampled multiple, paraphyletic genera.

Figure S3. Maximum likelihood topology from all mitochondrial coding regions, partitioned by codon position, of the 60-tip dataset (i.e., inclusive of *Gymnomyza aubryana*). Bootstrap support is listed for nodes that received <100. Clades A–H are referenced in the text. Only genus names are given, except for instances of where we sampled multiple, paraphyletic genera.

Figure S4. Maximum likelihood topology from all mitochondrial coding regions, partitioned by codon position, of the 60-tip dataset (i.e., lacking *Gymnomyza aubryana*). Bootstrap support is listed for nodes that received <100. Clades A–H are referenced in the text. Only genus names are given, except for instances of where we sampled multiple, paraphyletic genera.

Figure S5. Bayesian maximum clade credibility tree from all mitochondrial coding regions, partitioned by codon position, of the 60-tip dataset (i.e., inclusive of *Gymnomyza aubryana*). Node support is given as posterior probabilities if less than 1. Clades A–H are referenced in the text. Only genus names are given, except for instances of where we sampled multiple, paraphyletic genera.

Figure S6. Bayesian maximum clade credibility tree from all mitochondrial coding regions, partitioned by codon position, of the 59-tip dataset (i.e., lacking *Gymnomyza aubryana*). Node support is given as posterior probabilities if less than 1. Clades A–H are referenced in the text. Only genus names are given, except for instances of where we sampled multiple, paraphyletic genera.

Figure S7. Uncertainty of *Gymnomyza aubryana.* Eight maximum likelihood trees based on the 75% complete, 60-tip dataset with varying degrees of the trimming parameter, B2, of Gblocks. B2 is the proportion of sequences at a flank position. Note that B2 ranges from 0.65 to 1.0. The amount of data increases as B2 decreases, due to the decrease of trimming stringency.
